# Supplementary material
Source: PubMed Central journal article supplement (PMC2567405)
Supplement: emboj2008175s11.pdf [file emboj2008175s11.pdf]

A

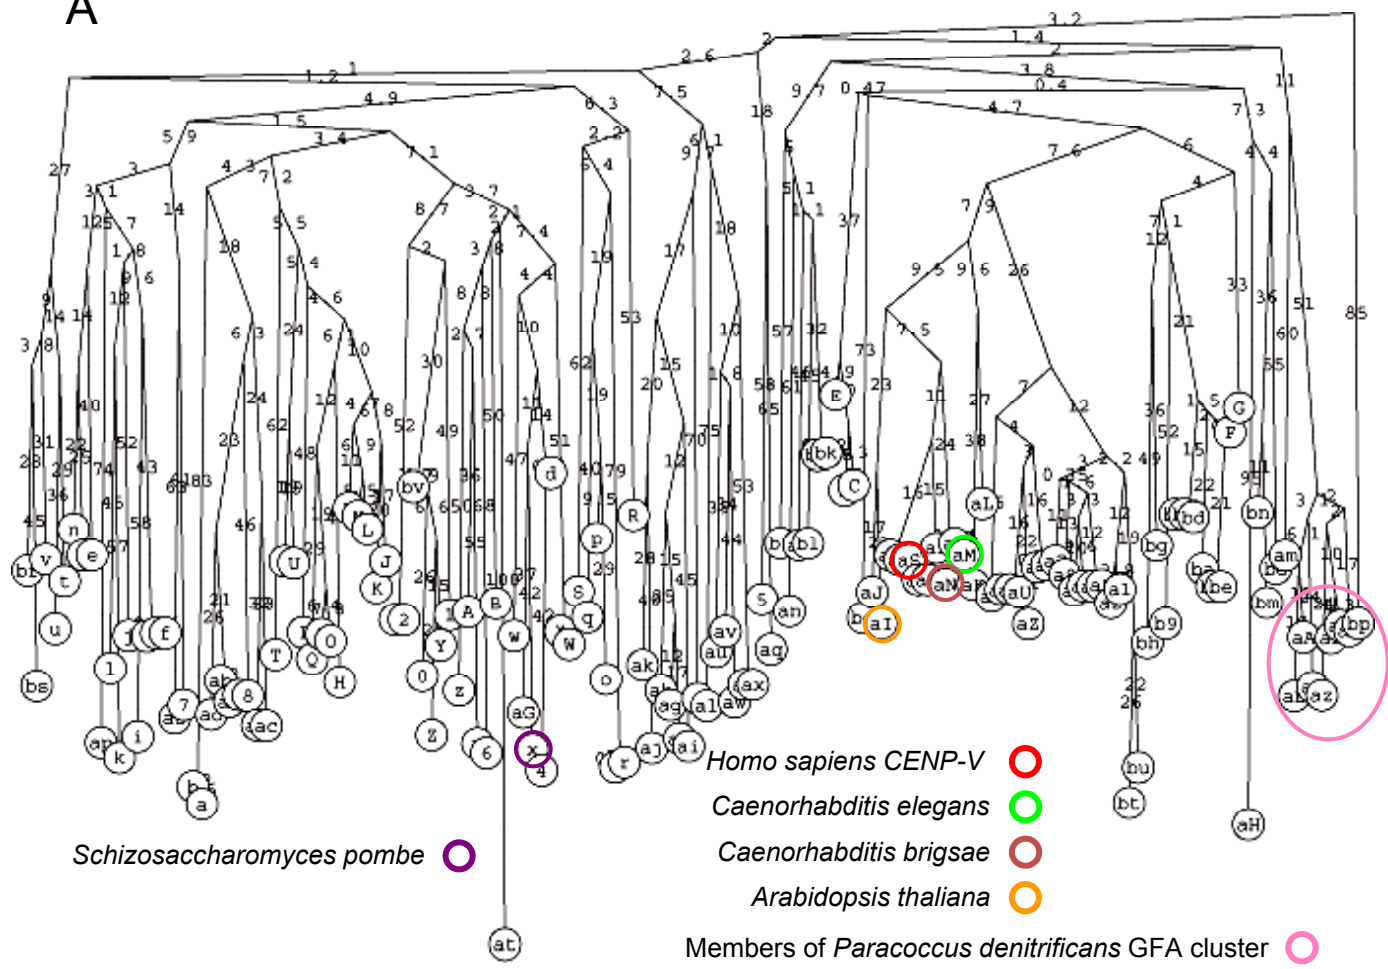

B

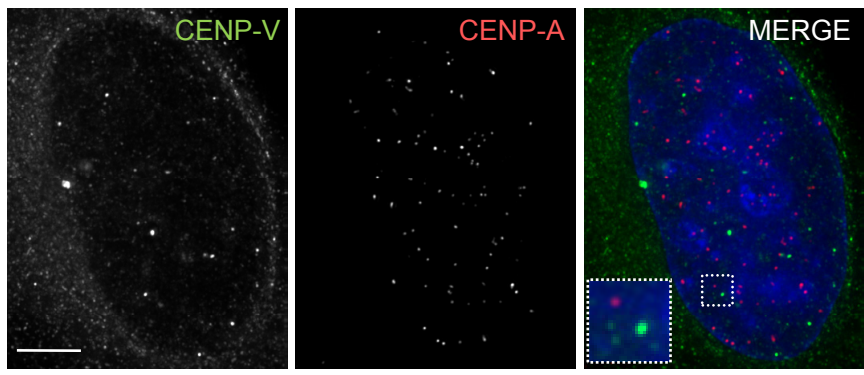

Tadeu et al., Supplementary Figure 1

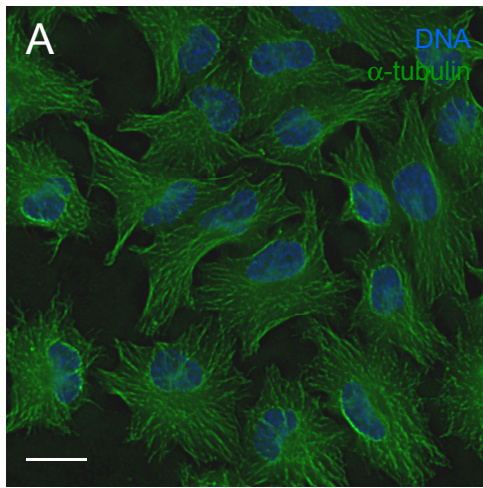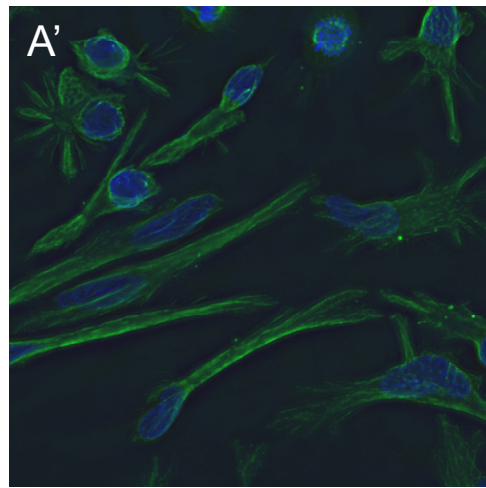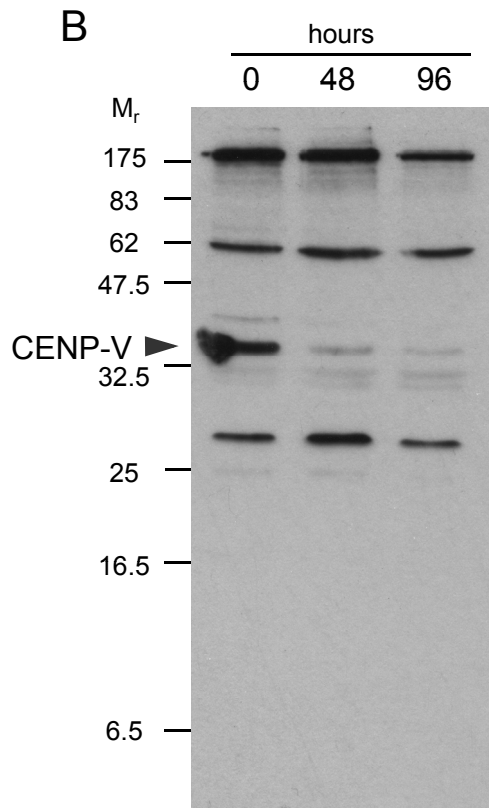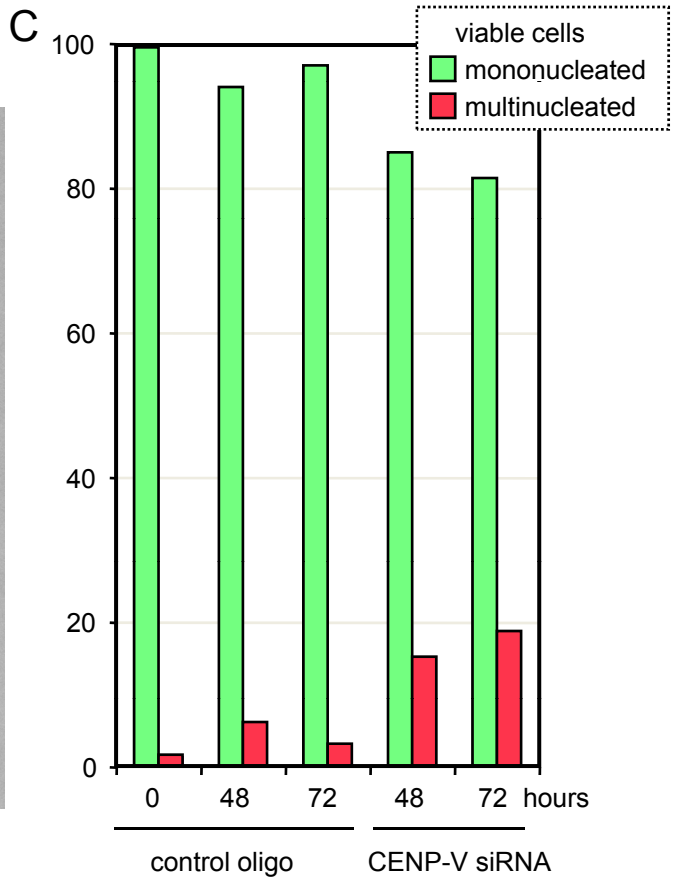

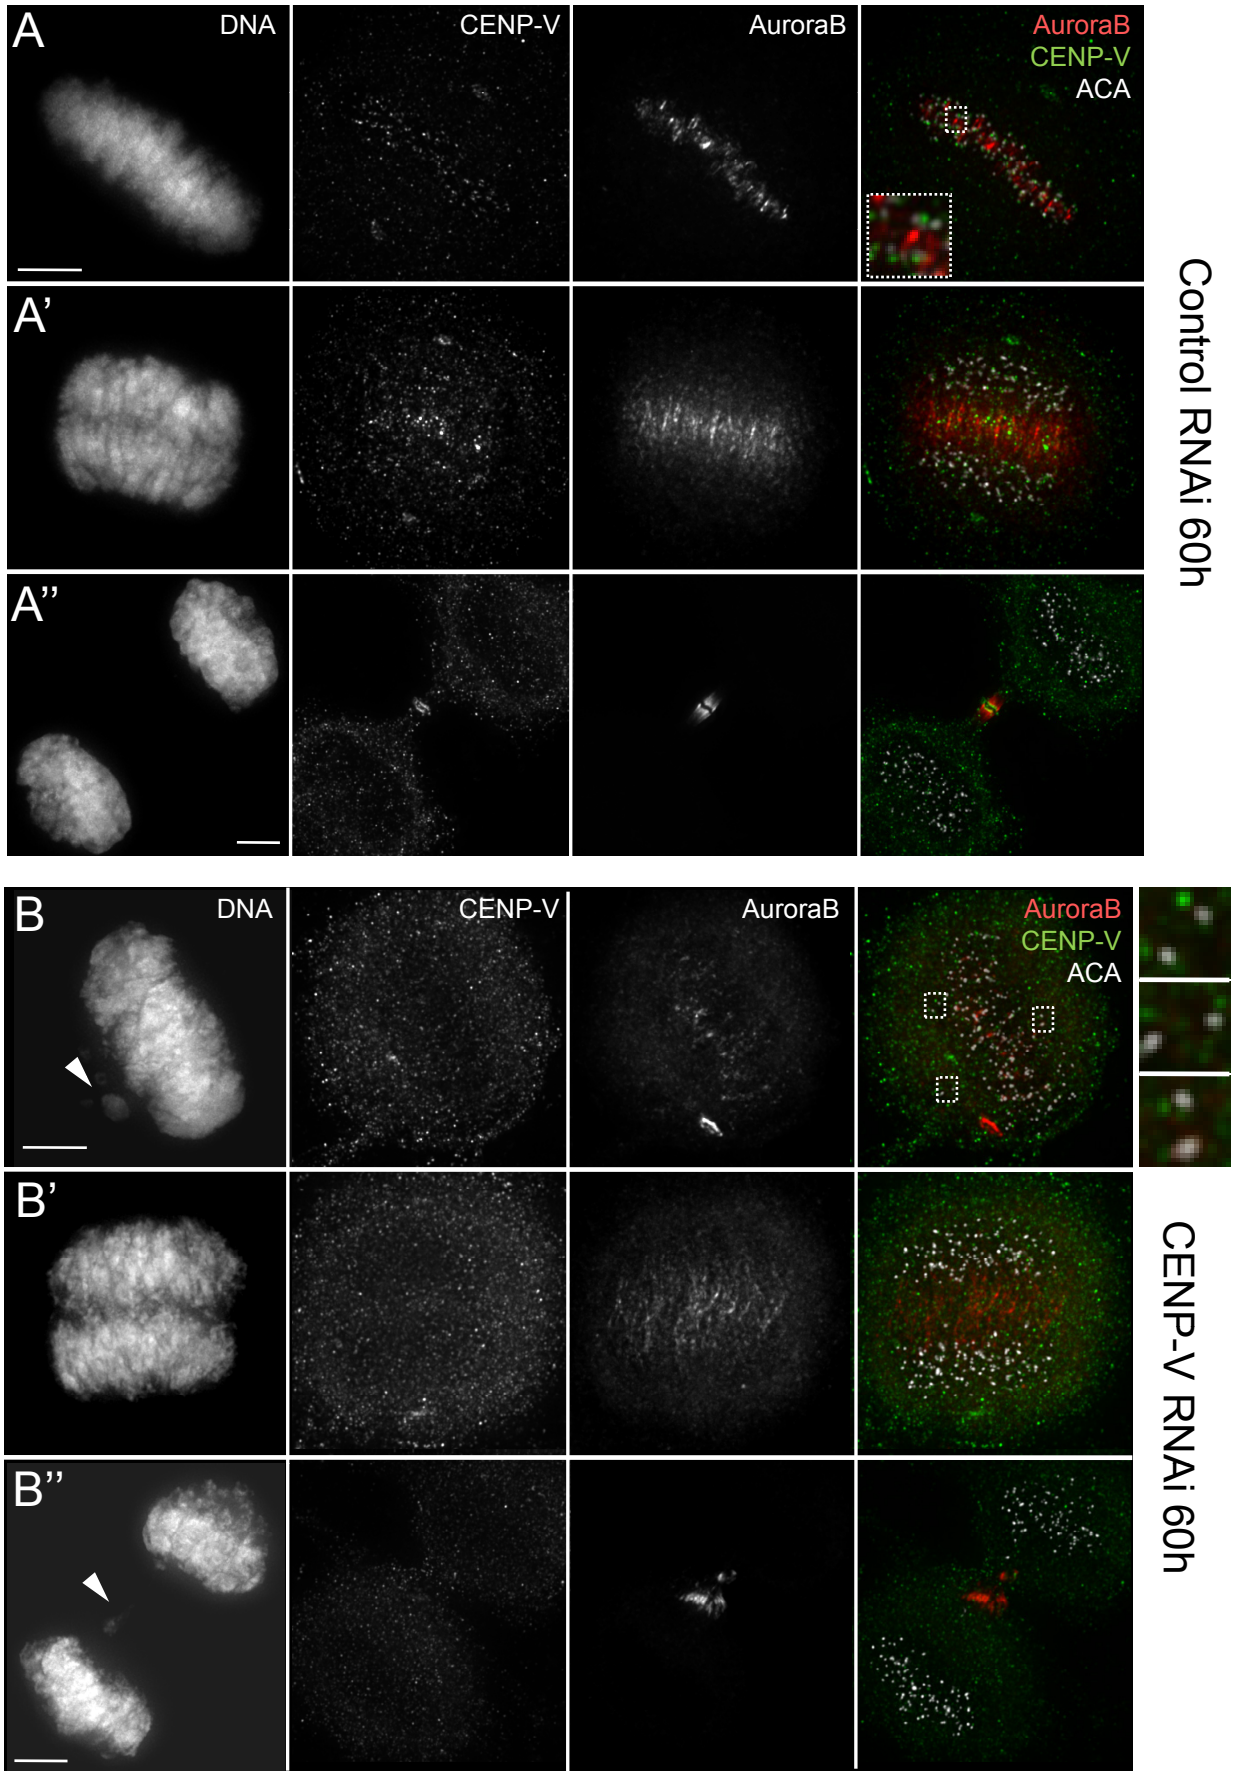

Tadeu et al., Supplementary Figure 3

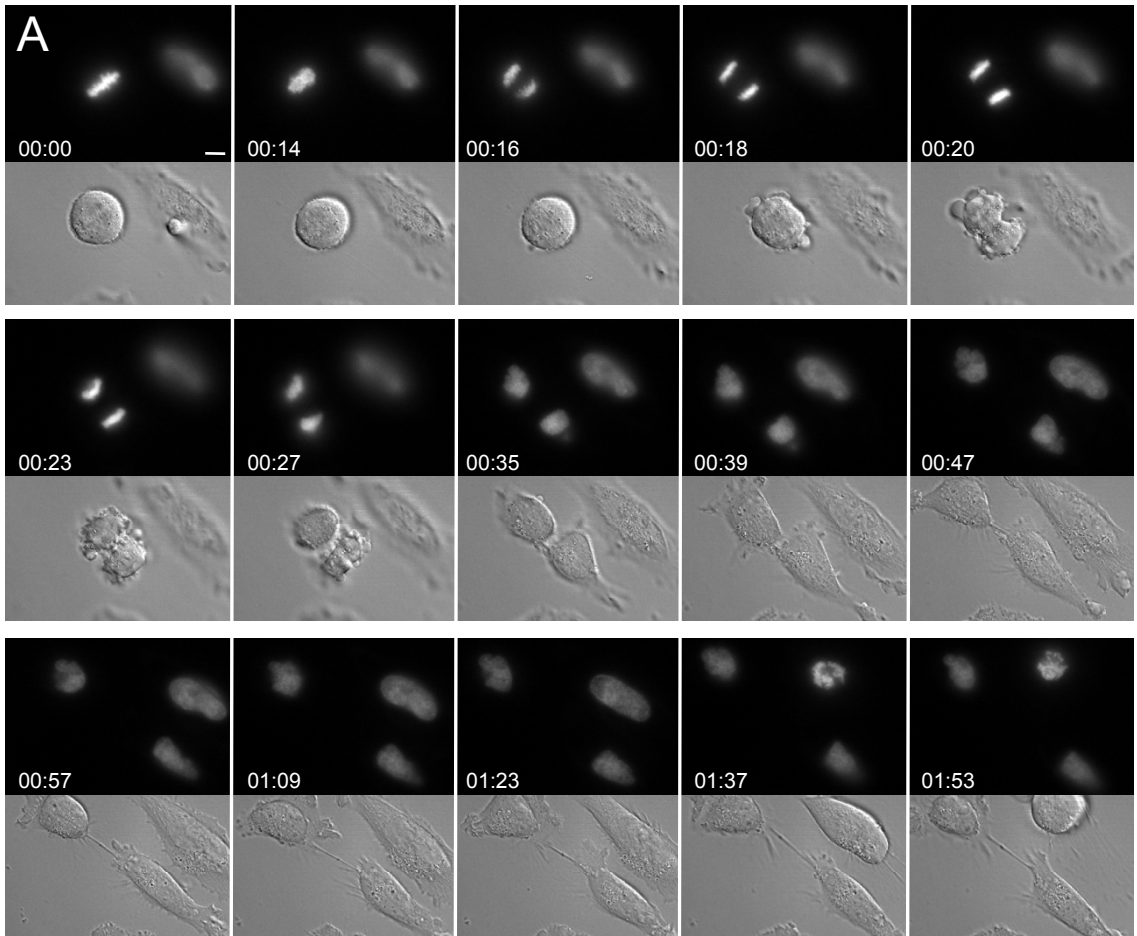

Tadeu et al., Supplementary Figure 4



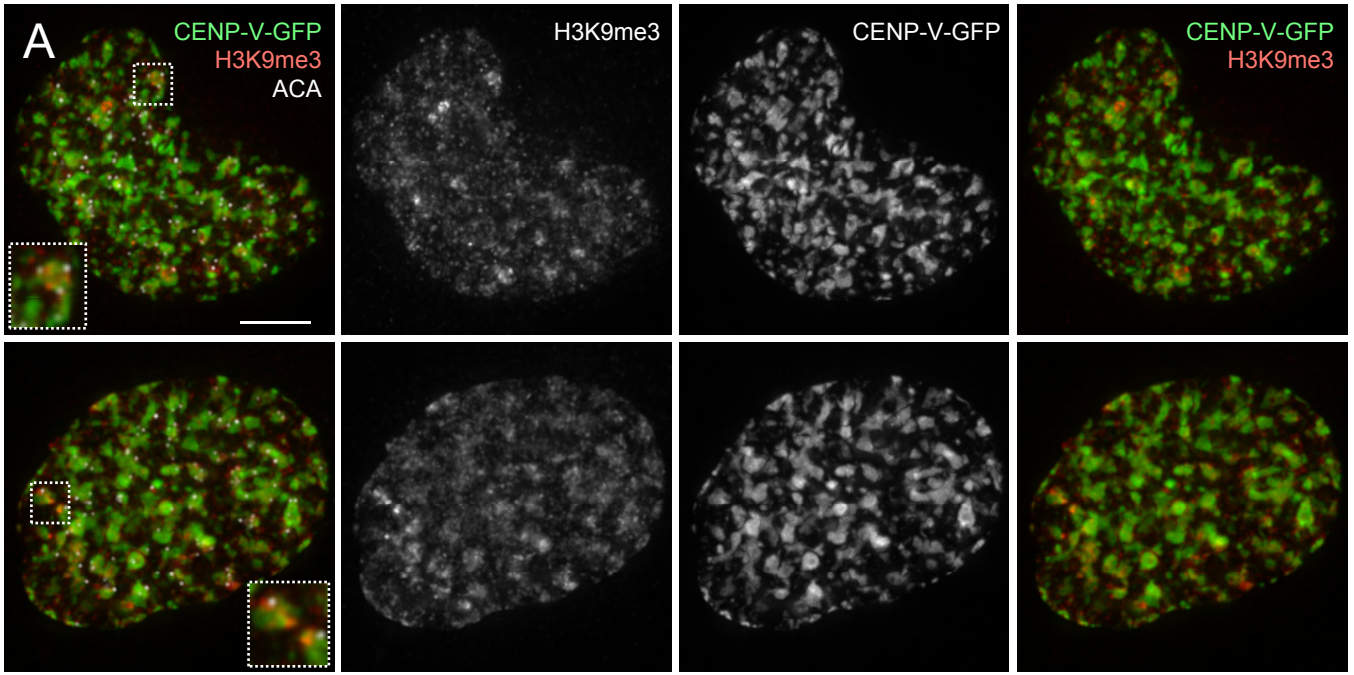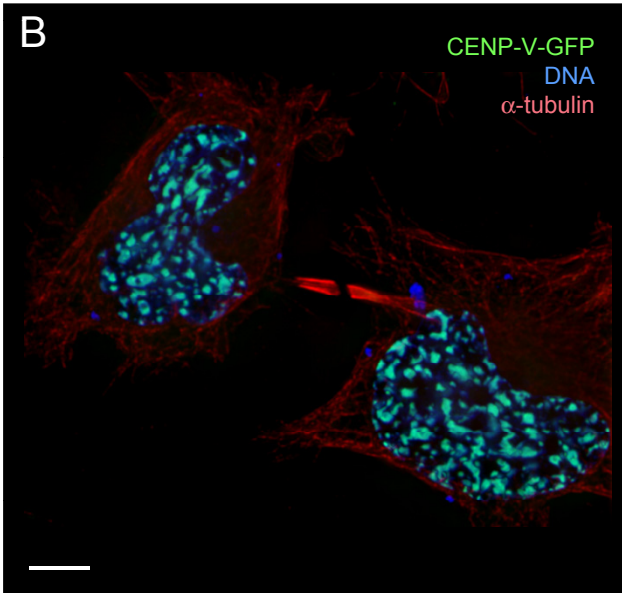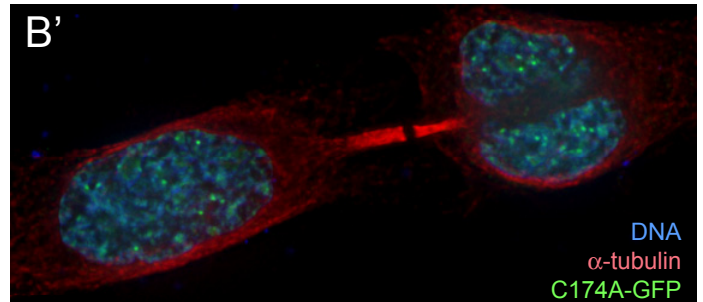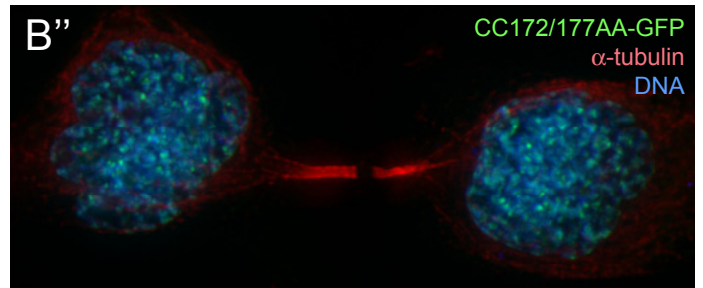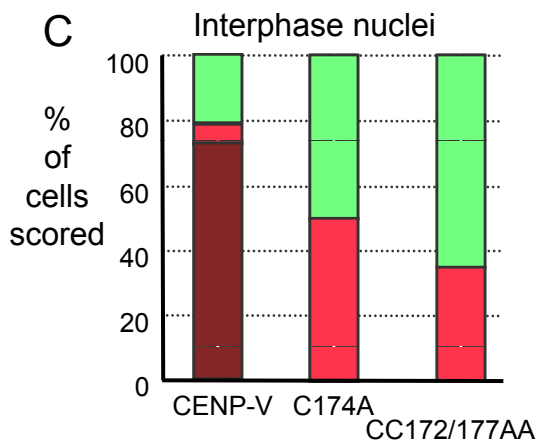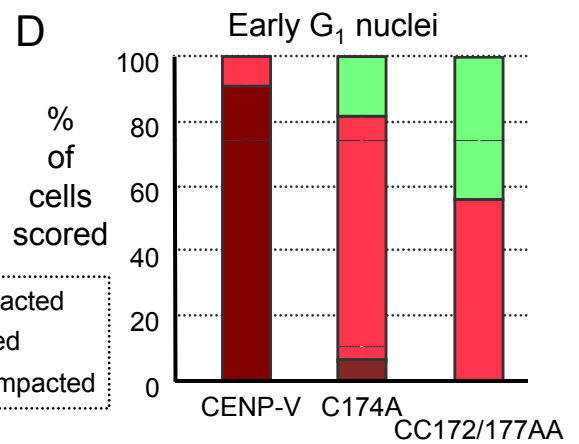

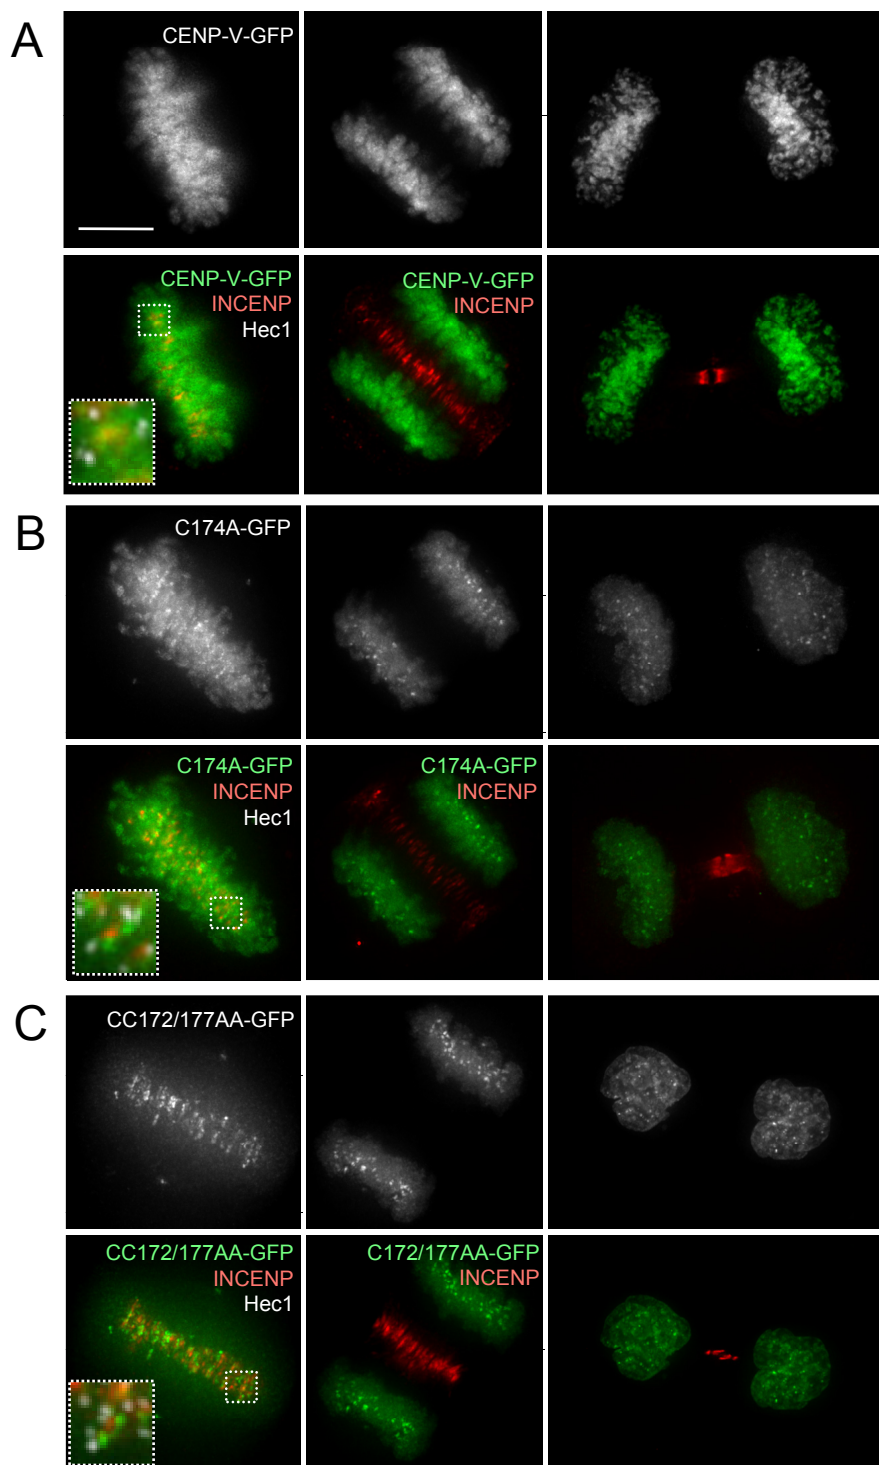

Tadeu et al., Supplementary Figure 6

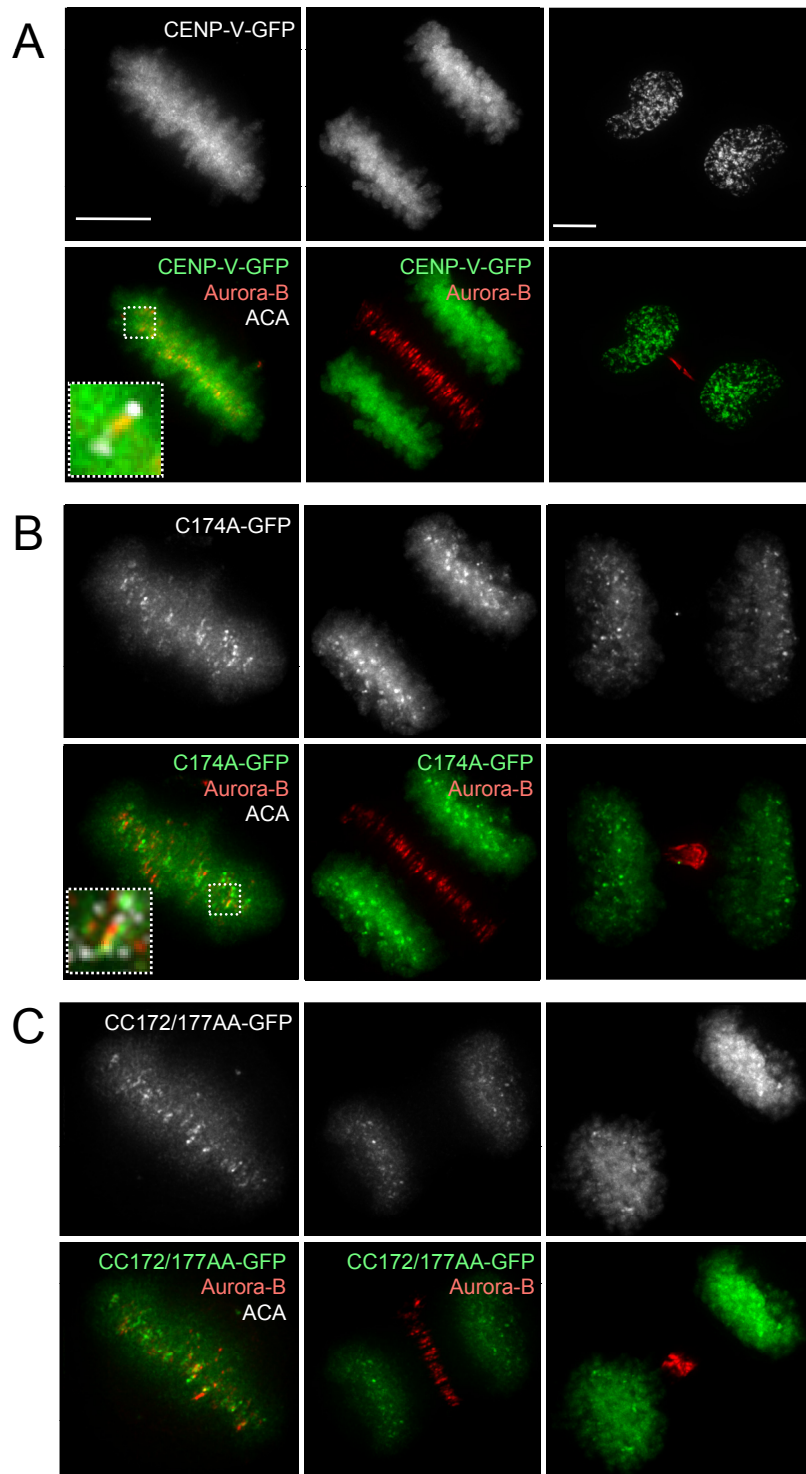

Tadeu et al., Supplementary Figure 7



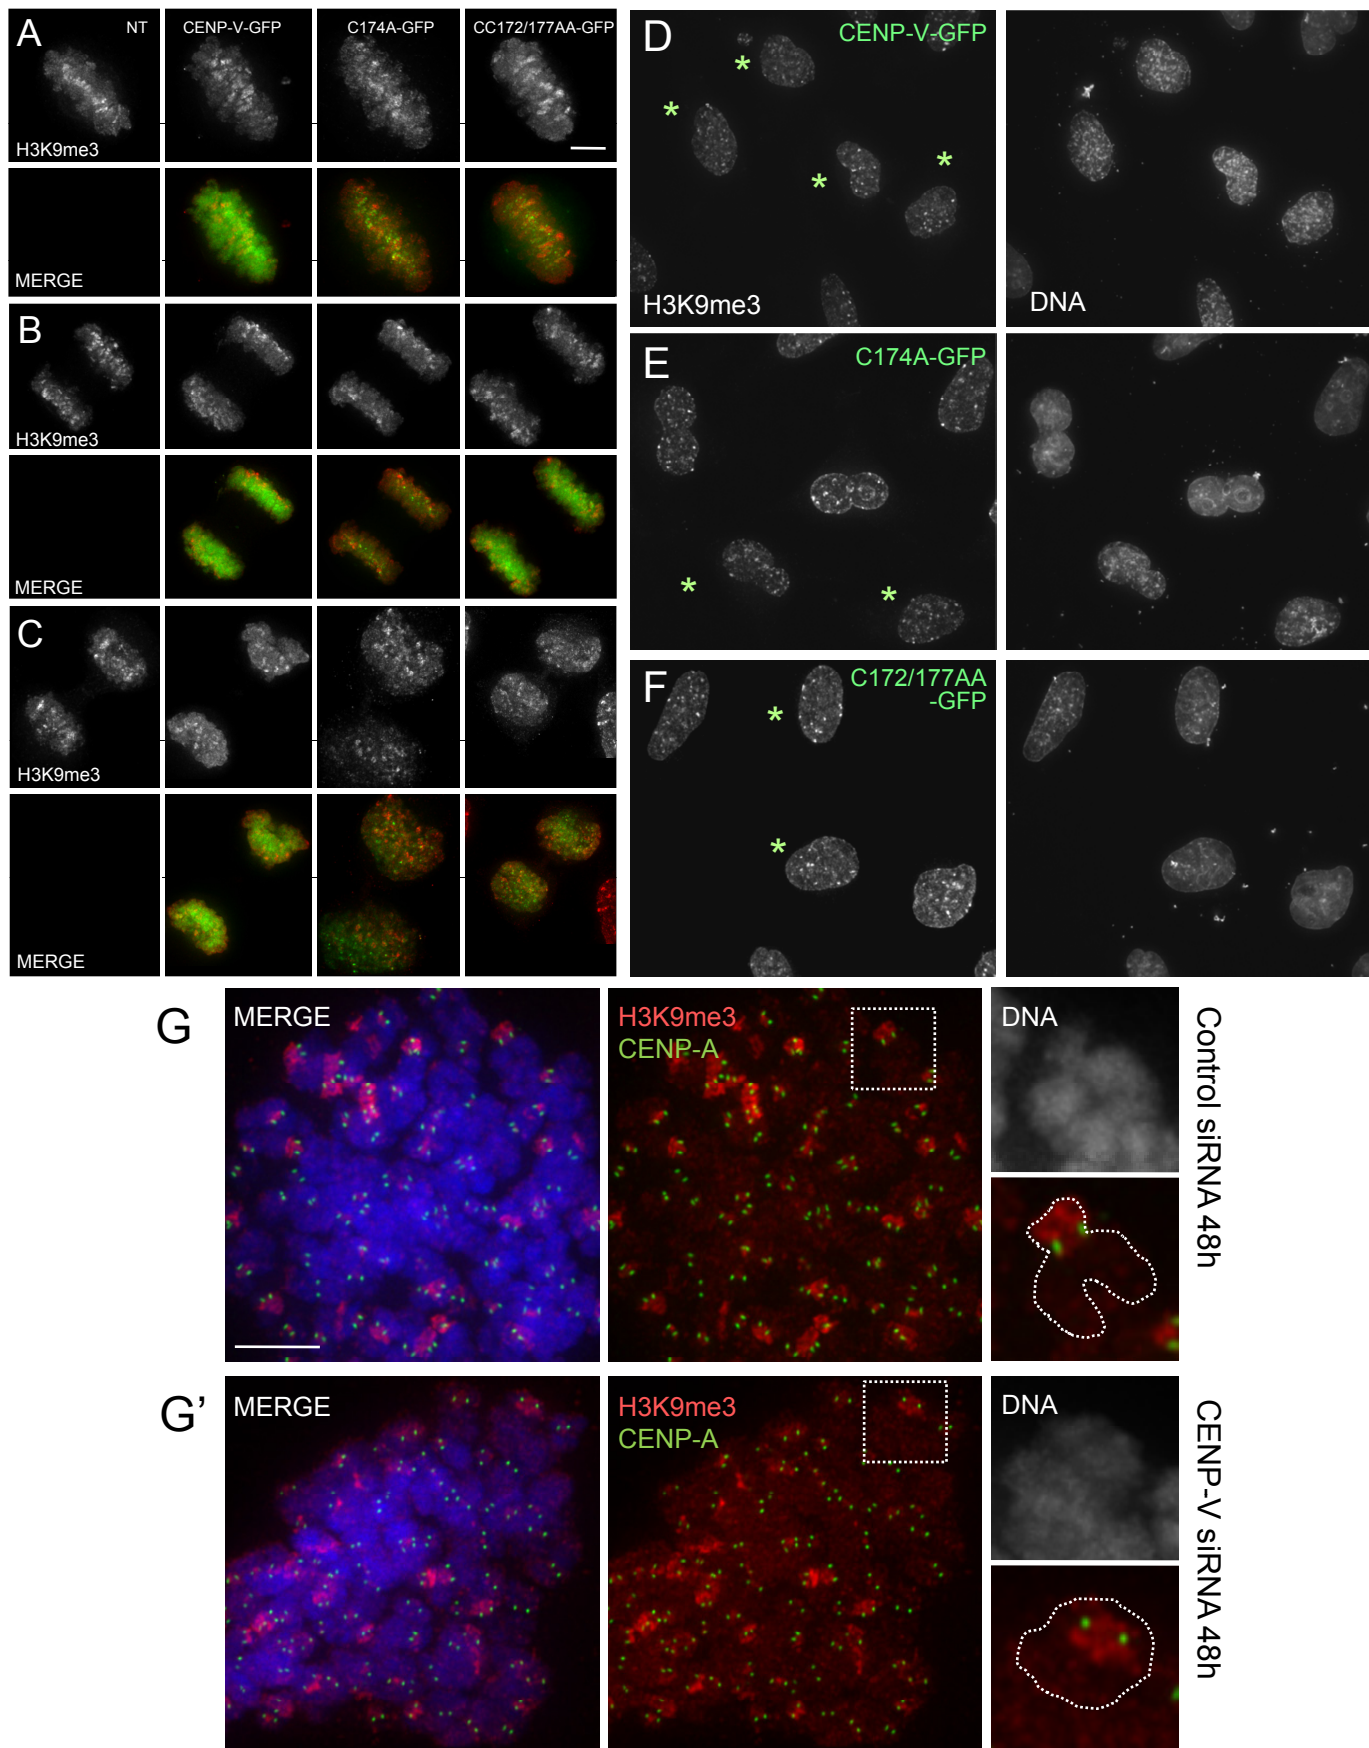

Tadeu et al., Supplementary Figure 8
